# Supplementary material for: The Amino-Terminal Region of Hepatitis E Virus ORF1 Containing a Methyltransferase (Met) and a Papain-Like Cysteine Protease (PCP) Domain Counteracts Type I Interferon Response
Source: Viruses. 2018 Dec 18;10(12):726. doi: 10.3390/v10120726 (PMC6315852; doi:10.3390/v10120726)
Supplement: Supplementary file 1 [file viruses-10-00726-s001.pdf]

# Supplementary Material

|              |              | Renilla (RLU) |        |        | Firefly (RLU) |       |         | Firefly/Renilla (F/R) |         |         | Mean (F/R) | %   |     |     | Mean (%) | S.D. (%) |  |
|--------------|--------------|---------------|--------|--------|---------------|-------|---------|-----------------------|---------|---------|------------|-----|-----|-----|----------|----------|--|
| Experiment 1 |              |               |        |        |               |       |         |                       |         |         |            |     |     |     |          |          |  |
| NT           | EV           | 200300        | 201930 | 193190 | 300           | 340   | 450     | 0.0015                | 0.0017  | 0.0023  | 0.0018     | 2   | 3   | 4   | 3        | 0.7      |  |
|              | ORF1         | -             | 520410 | 502360 | -             | 2340  | 2280    | -                     | 0.0045  | 0.0045  | 0.0045     | -   | 7   | 7   | 7        | 0.0      |  |
|              | MetYPCP      | 264980        | 282670 | 235400 | 290           | 320   | 190     | 0.0011                | 0.0011  | 0.0008  | 0.0010     | 2   | 2   | 1   | 2        | 0.3      |  |
|              | PCP          | 177860        | 200810 | 186360 | 220           | 220   | 350     | 0.0012                | 0.0011  | 0.0019  | 0.0014     | 2   | 2   | 3   | 2        | 0.7      |  |
|              | Met          | 136510        | 171450 | 148370 | 120           | 220   | 220     | 0.0009                | 0.0013  | 0.0015  | 0.0012     | 1   | 2   | 2   | 2        | 0.5      |  |
|              | MetY         | 241570        | 264610 | 261210 | 300           | 420   | 270     | 0.0012                | 0.0016  | 0.0010  | 0.0013     | 2   | 3   | 2   | 2        | 0.5      |  |
|              | YPCP         | 187780        | 170320 | 223080 | 370           | 260   | 450     | 0.0020                | 0.0015  | 0.0020  | 0.0018     | 3   | 2   | 3   | 3        | 0.4      |  |
|              | Y            | 324560        | 433740 | 414400 | 550           | 690   | 750     | 0.0017                | 0.0016  | 0.0018  | 0.0017     | 3   | 3   | 3   | 3        | 0.2      |  |
|              | X            | 233610        | 352240 | 365320 | 290           | 300   | 350     | 0.0012                | 0.0009  | 0.0010  | 0.0010     | 2   | 1   | 2   | 2        | 0.3      |  |
| IFN          | MV-V         | 271880        | 268710 | 256650 | 200           | 300   | 220     | 0.0007                | 0.0011  | 0.0009  | 0.0009     | 1   | 2   | 1   | 1        | 0.3      |  |
|              | EV           | 216550        | 222760 | 207050 | 14800         | 13890 | 11800   | 0.0683                | 0.0624  | 0.0570  | 0.0626     | 109 | 100 | 91  | 100      | 9.1      |  |
|              | ORF1         | 558780        | 579090 | 550160 | 24400         | 25720 | 22420   | 0.0437                | 0.0444  | 0.0408  | 0.0429     | 70  | 71  | 65  | 69       | 3.1      |  |
|              | MetYPCP      | 328990        | 291910 | 280530 | 6050          | 5840  | 6230    | 0.0184                | 0.0200  | 0.0222  | 0.0202     | 29  | 32  | 35  | 32       | 3.1      |  |
|              | PCP          | 214980        | 231230 | 233310 | 8470          | 9380  | 8770    | 0.0394                | 0.0406  | 0.0376  | 0.0392     | 63  | 65  | 60  | 63       | 2.4      |  |
|              | Met          | 209910        | 201380 | 191460 | 15920         | 14320 | 13570   | 0.0758                | 0.0711  | 0.0709  | 0.0726     | 121 | 114 | 113 | 116      | 4.5      |  |
|              | MetY         | 307740        | 297750 | 333400 | 14070         | 12090 | 14430   | 0.0457                | 0.0406  | 0.0433  | 0.0432     | 73  | 65  | 69  | 69       | 4.1      |  |
|              | YPCP         | 245040        | 252760 | 215480 | 15830         | 15870 | 14360   | 0.0646                | 0.0628  | 0.0666  | 0.0647     | 103 | 100 | 107 | 103      | 3.1      |  |
|              | Y            | 485760        | 520570 | 427280 | 25220         | 24900 | 19510   | 0.0519                | 0.0478  | 0.0457  | 0.0485     | 83  | 76  | 73  | 77       | 5.1      |  |
| NT           | X            | 442440        | 417760 | 424150 | 14950         | 17650 | 19960   | 0.0338                | 0.0422  | 0.0471  | 0.0410     | 54  | 68  | 75  | 66       | 10.7     |  |
|              | MV-V         | 314250        | 303040 | 312720 | 740           | 930   | 760     | 0.0024                | 0.0031  | 0.0024  | 0.0026     | 4   | 5   | 4   | 4        | 0.6      |  |
|              | Experiment 2 |               |        |        |               |       |         |                       |         |         |            |     |     |     |          |          |  |
|              | EV           | 70170         | 66930  | 65930  | 130           | 80    | 150     | 0.00185               | 0.0012  | 0.00228 | 0.0018     | 9   | 6   | 11  | 9        | 2.7      |  |
|              | ORF1         | 149490        | 167270 | 167870 | 110           | 140   | 100     | 0.00074               | 0.00084 | 0.0006  | 0.0007     | 4   | 4   | 3   | 4        | 0.6      |  |
|              | MetYPCP      | 36800         | 29700  | 44740  | 60            | 60    | 60      | 0.00163               | 0.00202 | 0.00134 | 0.0017     | 8   | 10  | 7   | 8        | 1.7      |  |
|              | PCP          | 48340         | 43100  | 50030  | 40            | 90    | 20      | 0.00083               | 0.00209 | 0.0004  | 0.0011     | 4   | 10  | 2   | 5        | 4.3      |  |
|              | Met          | 29500         | 28030  | 30250  | 40            | 50    | 70      | 0.00136               | 0.00178 | 0.00231 | 0.0018     | 7   | 9   | 11  | 9        | 2.4      |  |
|              | MetY         | 46100         | 44970  | 50250  | 110           | 60    | 130     | 0.00239               | 0.00133 | 0.00259 | 0.0021     | 12  | 7   | 13  | 10       | 3.3      |  |
| IFN          | YPCP         | 65090         | 81310  | 79390  | 60            | 110   | 140     | 0.00092               | 0.00135 | 0.00176 | 0.0013     | 5   | 7   | 9   | 7        | 2.1      |  |
|              | Y            | 55110         | 42850  | 46580  | 130           | 30    | 60      | 0.00236               | 0.0007  | 0.00129 | 0.0014     | 12  | 3   | 6   | 7        | 4.2      |  |
|              | X            | 112680        | 127890 | 119500 | 120           | 130   | 70      | 0.00106               | 0.00102 | 0.00059 | 0.0009     | 5   | 5   | 3   | 4        | 1.3      |  |
|              | MV-V         | 35540         | 40000  | 30880  | 90            | 100   | 20      | 0.00253               | 0.0025  | 0.00065 | 0.0019     | 13  | 12  | 3   | 9        | 5.3      |  |
|              | EV           | 81100         | 90050  | 87250  | 1540          | 1610  | 2080    | 0.01899               | 0.01788 | 0.02384 | 0.02024    | 94  | 88  | 118 | 100      | 15.7     |  |
|              | ORF1         | 226430        | 222010 | 192670 | 2450          | 3660  | 2780    | 0.01082               | 0.01649 | 0.01443 | 0.01391    | 53  | 81  | 71  | 69       | 14.2     |  |
|              | MetYPCP      | 51430         | 60800  | 52650  | 790           | 800   | 740     | 0.01536               | 0.01316 | 0.01406 | 0.01419    | 76  | 65  | 69  | 70       | 5.5      |  |
|              | PCP          | 46860         | 43900  | 46970  | 970           | 1190  | 1270    | 0.0207                | 0.02711 | 0.02704 | 0.02495    | 102 | 134 | 134 | 123      | 18.2     |  |
|              | Met          | 37880         | 49790  | 45390  | 1180          | 1190  | 1190    | 0.03115               | 0.0239  | 0.02622 | 0.02709    | 154 | 118 | 130 | 134      | 18.3     |  |
| NT           | MetY         | 54120         | 57500  | 65730  | 1850          | 2100  | 2540    | 0.03418               | 0.03652 | 0.03864 | 0.03645    | 169 | 180 | 191 | 180      | 11.0     |  |
|              | YPCP         | 92860         | 93870  | 77410  | 2280          | 2420  | 1860    | 0.02455               | 0.02578 | 0.02403 | 0.02479    | 121 | 127 | 119 | 122      | 4.4      |  |
|              | Y            | 84040         | 81300  | 77870  | 1870          | 1660  | 1840    | 0.02225               | 0.02042 | 0.02363 | 0.02210    | 110 | 101 | 117 | 109      | 8.0      |  |
|              | X            | 183290        | 152810 | 116600 | 3450          | 2990  | 2390    | 0.01882               | 0.01957 | 0.0205  | 0.01963    | 93  | 97  | 101 | 97       | 4.1      |  |
|              | MV-V         | 49480         | 75870  | 57270  | 100           | 130   | 60      | 0.00202               | 0.00171 | 0.00105 | 0.00159    | 10  | 8   | 5   | 8        | 2.5      |  |
|              | Experiment 3 |               |        |        |               |       |         |                       |         |         |            |     |     |     |          |          |  |
|              | EV           | 202890        | 217220 | 173590 | 250           | 450   | 250     | 0.00123               | 0.00207 | 0.00144 | 0.00158    | 4   | 6   | 4   | 5        | 1.4      |  |
|              | ORF1         | 329300        | 344920 | 331430 | 1430          | 1500  | 1200    | 0.00434               | 0.00435 | 0.00362 | 0.00410    | 13  | 13  | 11  | 13       | 1.3      |  |
|              | MetYPCP      | 306760        | 303370 | 280160 | 130           | 170   | 210     | 0.00042               | 0.00056 | 0.00075 | 0.00058    | 1   | 2   | 2   | 2        | 0.5      |  |
| PCP          | 121330       | 145490        | 172800 | 130    | 170           | 290   | 0.00107 | 0.00117               | 0.00168 | 0.00131 | 3          | 4   | 5   | 4   | 1.0      |          |  |
| Met          | 173750       | 179090        | 158860 | 180    | 220           | 210   | 0.00104 | 0.00123               | 0.00132 | 0.00120 | 3          | 4   | 4   | 4   | 0.5      |          |  |
| MetY         | 284940       | 361920        | 361530 | 350    | 440           | 460   | 0.00123 | 0.00122               | 0.00127 | 0.00124 | 4          | 4   | 4   | 4   | 0.1      |          |  |
| YPCP         | 278550       | 268710        | 260290 | 370    | 220           | 330   | 0.00133 | 0.00082               | 0.00127 | 0.00114 | 4          | 3   | 4   | 4   | 0.9      |          |  |
| Y            | 192870       | 293460        | 313440 | 230    | 330           | 440   | 0.00119 | 0.00112               | 0.00140 | 0.00124 | 4          | 3   | 4   | 4   | 0.5      |          |  |
| IFN          | X            | 39720         | 500870 | 381910 | 20            | 340   | 230     | 0.00050               | 0.00068 | 0.00060 | 0.00059    | 2   | 2   | 2   | 2        | 0.3      |  |
|              | MV-V         | 392070        | 472870 | 431490 | 140           | 230   | 230     | 0.00036               | 0.00049 | 0.00053 | 0.00046    | 1   | 2   | 2   | 1        | 0.3      |  |
|              | EV           | 186360        | 188650 | 207150 | 5390          | 6380  | 7110    | 0.02892               | 0.03382 | 0.03432 | 0.03235    | 89  | 105 | 106 | 100      | 9.2      |  |
|              | ORF1         | 331090        | 407430 | 411700 | 11090         | 13640 | 15280   | 0.03350               | 0.03348 | 0.03711 | 0.03470    | 104 | 103 | 115 | 107      | 6.5      |  |
|              | MetYPCP      | 302210        | 317880 | 370720 | 1800          | 1470  | 1820    | 0.00596               | 0.00462 | 0.00491 | 0.00516    | 18  | 14  | 15  | 16       | 2.2      |  |
|              | PCP          | 151110        | 157330 | 167870 | 4460          | 4000  | 4730    | 0.02951               | 0.02542 | 0.02818 | 0.02771    | 91  | 79  | 87  | 86       | 6.4      |  |
|              | Met          | 199150        | 181240 | 173830 | 8380          | 9060  | 8410    | 0.04208               | 0.04999 | 0.04838 | 0.04682    | 130 | 155 | 150 | 145      | 12.9     |  |
|              | MetY         | 404720        | 417510 | 428310 | 7850          | 7970  | 7740    | 0.01940               | 0.01909 | 0.01807 | 0.01885    | 60  | 59  | 56  | 58       | 2.1      |  |
|              | YPCP         | 307040        | 306240 | 338200 | 6900          | 7350  | 7990    | 0.02247               | 0.02400 | 0.02363 | 0.02337    | 69  | 74  | 73  | 72       | 2.5      |  |
| NT           | Y            | 341030        | 353540 | 344960 | 10160         | 12200 | 10530   | 0.02979               | 0.03451 | 0.03053 | 0.03161    | 92  | 107 | 94  | 98       | 7.8      |  |
|              | X            | 606560        | 569470 | 711570 | 10210         | 8720  | 11720   | 0.01683               | 0.01531 | 0.01647 | 0.01621    | 52  | 47  | 51  | 50       | 2.5      |  |
|              | MV-V         | 540820        | 599960 | 571560 | 510           | 600   | 460     | 0.00094               | 0.00100 | 0.00080 | 0.00092    | 3   | 3   | 2   | 3        | 0.3      |  |
|              | Experiment 4 |               |        |        |               |       |         |                       |         |         |            |     |     |     |          |          |  |
|              | EV           | 137220        | 149460 | 135880 | 170           | 220   | 180     | 0.00124               | 0.00147 | 0.00132 | 0.00135    | 2   | 2   | 2   | 2        | 0.2      |  |
|              | ORF1         | 189840        | 186430 | 187930 | 2180          | 4070  | 2210    | 0.01148               | 0.02183 | 0.01176 | 0.01502    | 19  | 37  | 20  | 25       | 10.0     |  |
|              | MetYPCP      | 127670        | 126210 | 147810 | 130           | 260   | 270     | 0.00102               | 0.00205 | 0.00183 | 0.00163    | 2   | 3   | 3   | 3        | 0.9      |  |
|              | PCP          | 91050         | 101560 | 84190  | 150           | 170   | 130     | 0.00165               | 0.00167 | 0.00154 | 0.00162    | 3   | 3   | 3   | 3        | 0.1      |  |
|              | Met          | 88370         | 92430  | 91270  | 210           | 170   | 190     | 0.00238               | 0.00184 | 0.00208 | 0.0021     | 4   | 3   | 4   | 4        | 0.5      |  |
| MetY         | 117910       | 97530         | 121100 | 320    | 190           | 240   | 0.00271 | 0.00195               | 0.00198 | 0.00221 | 5          | 3   | 3   | 4   | 0.7      |          |  |
| IFN          | YPCP         | 108680        | 108150 | 94910  | 160           | 210   | 290     | 0.00147               | 0.00194 | 0.00306 | 0.00216    | 2   | 3   | 5   | 4        | 1.4      |  |
|              | Y            | 183030        | 136090 | 171300 | 410           | 570   | 530     | 0.00224               | 0.00419 | 0.00309 | 0.00317    | 4   | 7   | 5   | 5        | 1.7      |  |
|              | X            | 27010         | 115520 | 133490 | 40            | 150   | 360     | 0.00148               | 0.0013  | 0.0027  | 0.00183    | 3   | 2   | 5   | 3        | 1.3      |  |
|              | MV-V         | 134080        | 124570 | 127210 | 180           | 160   | 200     | 0.00134               | 0.00128 | 0.00157 | 0.0014     | 2   | 2   | 3   | 2        | 0.3      |  |
|              | EV           | 170650        | 169920 | 149520 | 9170          | 9290  | 10250   | 0.05374               | 0.05467 | 0.06855 | 0.05899    | 91  | 93  | 116 | 100      | 14.1     |  |
|              | ORF1         | 229380        | 246710 | 192860 | 19060         | 17490 | 15540   | 0.08309               | 0.07089 | 0.08058 | 0.07819    | 141 | 120 | 137 | 133      | 10.9     |  |
|              | MetYPCP      | 137030        | 138520 | 121100 | 5190          | 5020  | 5660    | 0.03787               | 0.03624 | 0.04674 | 0.04028    | 64  | 61  | 79  | 68       | 9.6      |  |
|              | PCP          | 111450        | 105190 | 112120 | 4750          | 3720  | 4160    | 0.04262               | 0.03536 | 0       |            |     |     |     |          |          |  |

**Table S1. Raw data from the luciferase reporter assays presented in Figure 1c.** Mean ratios between firefly and *Renilla* luciferase activities were calculated (F/R) and are presented as percentages (%) of the treated EV control in 4 independent experiments. Mean values and standard deviation (S.D.) are presented for not-treated (NT) and IFN- $\beta$ -treated (IFN) conditions.

|              |            | Renilla (RLU) |        |        | Firefly (RLU) |       |       | Firefly/Renilla (F/R) |         |         | Mean (F/R) | %   |     |     | Mean (%) | S.D. (%) |
|--------------|------------|---------------|--------|--------|---------------|-------|-------|-----------------------|---------|---------|------------|-----|-----|-----|----------|----------|
| Experiment 1 |            |               |        |        |               |       |       |                       |         |         |            |     |     |     |          |          |
| NT           | EV         | 200300        | 201930 | 193190 | 300           | 340   | 450   | 0.0015                | 0.0017  | 0.0023  | 0.0018     | 2   | 3   | 4   | 3        | 0.7      |
|              | MetYPCP-G3 | 264980        | 282670 | 235400 | 290           | 320   | 190   | 0.0011                | 0.0011  | 0.0008  | 0.0010     | 2   | 2   | 1   | 2        | 0.3      |
|              | PCP-G3     | 177860        | 200810 | 186360 | 220           | 220   | 350   | 0.0012                | 0.0011  | 0.0019  | 0.0014     | 2   | 2   | 3   | 2        | 0.7      |
|              | MetYPCP-G1 | 202530        | 207220 | 222490 | 360           | 310   | 300   | 0.0018                | 0.0015  | 0.0013  | 0.0015     | 3   | 2   | 2   | 2        | 0.3      |
|              | PCP-G1     | 148850        | 212410 | 210900 | 260           | 260   | 360   | 0.0017                | 0.0012  | 0.0017  | 0.0016     | 3   | 2   | 3   | 2        | 0.5      |
|              | MV-V       | 271880        | 268710 | 256650 | 200           | 300   | 220   | 0.0007                | 0.0011  | 0.0009  | 0.0009     | 1   | 2   | 1   | 1        | 0.3      |
| IFN          | EV         | 216550        | 222760 | 207050 | 14800         | 13890 | 11800 | 0.0683                | 0.0624  | 0.0570  | 0.0626     | 109 | 100 | 91  | 100      | 9.1      |
|              | MetYPCP-G3 | 328990        | 291910 | 280530 | 6050          | 5840  | 6230  | 0.0184                | 0.0200  | 0.0222  | 0.0202     | 29  | 32  | 35  | 32       | 3.1      |
|              | PCP-G3     | 214980        | 231230 | 233310 | 8470          | 9380  | 8770  | 0.0394                | 0.0406  | 0.0376  | 0.0392     | 63  | 65  | 60  | 63       | 2.4      |
|              | MetYPCP-G1 | 268250        | 245390 | 287010 | 10810         | 8390  | 10550 | 0.0403                | 0.0342  | 0.0368  | 0.0371     | 64  | 55  | 59  | 59       | 4.9      |
|              | PCP-G1     | 245420        | 228780 | 221960 | 16700         | 18660 | 14520 | 0.0680                | 0.0816  | 0.0854  | 0.0717     | 109 | 130 | 105 | 115      | 13.8     |
|              | MV-V       | 314250        | 303040 | 312720 | 740           | 930   | 760   | 0.0024                | 0.0031  | 0.0024  | 0.0026     | 4   | 5   | 4   | 4        | 0.6      |
| Experiment 2 |            |               |        |        |               |       |       |                       |         |         |            |     |     |     |          |          |
| NT           | EV         | 70170         | 66930  | 65930  | 130           | 80    | 150   | 0.00185               | 0.0012  | 0.00228 | 0.0018     | 9   | 6   | 11  | 9        | 2.7      |
|              | MetYPCP-G3 | 36800         | 29700  | 44740  | 60            | 60    | 60    | 0.00163               | 0.00202 | 0.00134 | 0.0017     | 8   | 10  | 7   | 8        | 1.7      |
|              | PCP-G3     | 48340         | 43100  | 50030  | 40            | 90    | 20    | 0.00083               | 0.00209 | 0.0004  | 0.0011     | 4   | 10  | 2   | 5        | 4.3      |
|              | MetYPCP-G1 | 45740         | 37020  | 43580  | 60            | 90    | 100   | 0.00131               | 0.00243 | 0.00229 | 0.0020     | 6   | 12  | 11  | 10       | 3.0      |
|              | PCP-G1     | 60430         | 54670  | 61390  | 80            | 70    | 70    | 0.00132               | 0.00128 | 0.00114 | 0.0012     | 7   | 6   | 6   | 6        | 0.5      |
|              | MV-V       | 35540         | 40000  | 30880  | 90            | 100   | 20    | 0.00253               | 0.0025  | 0.00065 | 0.0019     | 13  | 12  | 3   | 9        | 5.3      |
| IFN          | EV         | 81100         | 90050  | 87250  | 1540          | 1610  | 2080  | 0.01899               | 0.01788 | 0.02384 | 0.02024    | 94  | 88  | 118 | 100      | 15.7     |
|              | MetYPCP-G3 | 51430         | 60800  | 52650  | 790           | 800   | 740   | 0.01536               | 0.01316 | 0.01406 | 0.01419    | 76  | 65  | 69  | 70       | 5.5      |
|              | PCP-G3     | 46860         | 43900  | 46970  | 970           | 1190  | 1270  | 0.0207                | 0.02711 | 0.02704 | 0.02495    | 102 | 134 | 134 | 123      | 18.2     |
|              | MetYPCP-G1 | 54080         | 60920  | 56870  | 1440          | 1730  | 1420  | 0.02663               | 0.0284  | 0.02497 | 0.02666    | 132 | 140 | 123 | 132      | 8.5      |
|              | PCP-G1     | 59910         | 66630  | 63450  | 1380          | 1420  | 1780  | 0.02303               | 0.02131 | 0.02805 | 0.02413    | 114 | 105 | 139 | 119      | 17.3     |
|              | MV-V       | 49480         | 75870  | 57270  | 100           | 130   | 60    | 0.00202               | 0.00171 | 0.00105 | 0.00159    | 10  | 8   | 5   | 8        | 2.5      |
| Experiment 3 |            |               |        |        |               |       |       |                       |         |         |            |     |     |     |          |          |
| NT           | EV         | 202890        | 217220 | 173590 | 250           | 450   | 250   | 0.00123               | 0.00207 | 0.00144 | 0.00158    | 4   | 6   | 4   | 5        | 1.4      |
|              | MetYPCP-G3 | 306760        | 303370 | 280160 | 130           | 170   | 210   | 0.00042               | 0.00056 | 0.00075 | 0.00058    | 1   | 2   | 2   | 2        | 0.5      |
|              | PCP-G3     | 121330        | 145490 | 172800 | 130           | 170   | 290   | 0.00107               | 0.00117 | 0.00168 | 0.00131    | 3   | 4   | 5   | 4        | 1.0      |
|              | MetYPCP-G1 | 247460        | 244000 | 277580 | 160           | 130   | 180   | 0.00065               | 0.00053 | 0.00065 | 0.00061    | 2   | 2   | 2   | 2        | 0.2      |
|              | PCP-G1     | 355340        | 499600 | 352410 | 260           | 360   | 240   | 0.00073               | 0.00072 | 0.00068 | 0.00071    | 2   | 2   | 2   | 2        | 0.1      |
|              | MV-V       | 392070        | 472870 | 431490 | 140           | 230   | 230   | 0.00036               | 0.00049 | 0.00053 | 0.00046    | 1   | 2   | 2   | 1        | 0.3      |
| IFN          | EV         | 186360        | 186650 | 207150 | 5390          | 6380  | 7110  | 0.02892               | 0.03382 | 0.03432 | 0.03235    | 89  | 105 | 106 | 100      | 9.2      |
|              | MetYPCP-G3 | 302210        | 317880 | 370720 | 1800          | 1470  | 1820  | 0.00596               | 0.00462 | 0.00491 | 0.00516    | 18  | 14  | 15  | 16       | 2.2      |
|              | PCP-G3     | 151110        | 157330 | 167870 | 4460          | 4000  | 4730  | 0.02951               | 0.02542 | 0.02818 | 0.02771    | 91  | 79  | 87  | 86       | 6.4      |
|              | MetYPCP-G1 | 335600        | 282950 | 299520 | 3110          | 3240  | 3230  | 0.00927               | 0.01145 | 0.01078 | 0.01050    | 29  | 35  | 33  | 32       | 3.5      |
|              | PCP-G1     | 412860        | 393580 | 372060 | 6850          | 5680  | 5980  | 0.01659               | 0.01443 | 0.01607 | 0.01570    | 51  | 45  | 50  | 49       | 3.5      |
|              | MV-V       | 540820        | 599960 | 571560 | 510           | 600   | 460   | 0.00094               | 0.00100 | 0.00080 | 0.00092    | 3   | 3   | 2   | 3        | 0.3      |
| Experiment 4 |            |               |        |        |               |       |       |                       |         |         |            |     |     |     |          |          |
| NT           | EV         | 137220        | 149460 | 135880 | 170           | 220   | 180   | 0.00124               | 0.00147 | 0.00132 | 0.0013452  | 2   | 2   | 2   | 2        | 0.2      |
|              | MetYPCP-G3 | 127670        | 126210 | 147810 | 130           | 260   | 270   | 0.00102               | 0.00206 | 0.00183 | 0.001635   | 2   | 3   | 3   | 3        | 0.9      |
|              | PCP-G3     | 91050         | 101560 | 84190  | 150           | 170   | 130   | 0.00165               | 0.00167 | 0.00154 | 0.0016218  | 3   | 3   | 3   | 3        | 0.1      |
|              | MetYPCP-G1 | 298560        | 298620 | 303850 | 310           | 240   | 210   | 0.00104               | 0.0008  | 0.00069 | 0.0008444  | 2   | 1   | 1   | 1        | 0.3      |
|              | PCP-G1     | 121710        | 112650 | 111290 | 300           | 310   | 440   | 0.00246               | 0.00275 | 0.00395 | 0.0030568  | 4   | 5   | 7   | 5        | 1.3      |
|              | MV-V       | 134080        | 124570 | 127210 | 180           | 160   | 200   | 0.00134               | 0.00128 | 0.00157 | 0.0013997  | 2   | 2   | 3   | 2        | 0.3      |
| IFN          | EV         | 170650        | 169920 | 149520 | 9170          | 9290  | 10250 | 0.05374               | 0.05467 | 0.06855 | 0.0589871  | 91  | 93  | 116 | 100      | 14.1     |
|              | MetYPCP-G3 | 137030        | 138520 | 121100 | 5190          | 5020  | 5660  | 0.03787               | 0.03624 | 0.04674 | 0.0402845  | 64  | 61  | 79  | 68       | 9.6      |
|              | PCP-G3     | 111450        | 105190 | 112120 | 4750          | 3720  | 4160  | 0.04262               | 0.03536 | 0.0371  | 0.0383626  | 72  | 60  | 63  | 65       | 6.4      |
|              | MetYPCP-G1 | 312570        | 304910 | 274430 | 10090         | 8540  | 9880  | 0.03228               | 0.02801 | 0.036   | 0.032097   | 55  | 47  | 61  | 54       | 6.8      |
|              | PCP-G1     | 125860        | 122480 | 113670 | 11860         | 12790 | 9390  | 0.09423               | 0.10443 | 0.08261 | 0.0937548  | 160 | 177 | 140 | 159      | 18.5     |
|              | MV-V       | 132770        | 136310 | 128020 | 460           | 640   | 520   | 0.00346               | 0.0047  | 0.00406 | 0.0040739  | 6   | 8   | 7   | 7        | 1.0      |
| Experiment 5 |            |               |        |        |               |       |       |                       |         |         |            |     |     |     |          |          |
| NT           | EV         | 34730         | 61960  | 53620  | 60            | 250   | 140   | 0.00173               | 0.00403 | 0.00261 | 0.0027911  | 2   | 5   | 3   | 3        | 1.4      |
|              | MetYPCP-G3 | 106760        | 106090 | 114750 | 180           | 200   | 240   | 0.00169               | 0.00189 | 0.00209 | 0.0018876  | 2   | 2   | 3   | 2        | 0.3      |
|              | PCP-G3     | 59960         | 57460  | 69510  | 140           | 100   | 160   | 0.00233               | 0.00174 | 0.0023  | 0.0021257  | 3   | 2   | 3   | 3        | 0.4      |
|              | MetYPCP-G1 | 55420         | 54140  | 62980  | 200           | 250   | 280   | 0.00361               | 0.00462 | 0.00445 | 0.0042241  | 4   | 6   | 5   | 5        | 0.7      |
|              | PCP-G1     | 46030         | 54840  | 50000  | 190           | 250   | 150   | 0.00413               | 0.00456 | 0.003   | 0.0038955  | 5   | 6   | 4   | 5        | 1.0      |
|              | MV-V       | 63230         | 55010  | 51370  | 120           | 100   | 100   | 0.0019                | 0.00182 | 0.00195 | 0.0018874  | 2   | 2   | 2   | 2        | 0.1      |
| IFN          | EV         | 70050         | 69220  | 61310  | 5650          | 5120  | 5390  | 0.08066               | 0.07397 | 0.08791 | 0.0808459  | 100 | 91  | 109 | 100      | 8.6      |
|              | MetYPCP-G3 | 130380        | 125220 | 99210  | 4130          | 3710  | 3680  | 0.03168               | 0.02963 | 0.03709 | 0.0327992  | 39  | 37  | 46  | 41       | 4.8      |
|              | PCP-G3     | 84470         | 70890  | 55510  | 4420          | 4310  | 3980  | 0.05233               | 0.0608  | 0.0717  | 0.0616078  | 65  | 75  | 89  | 76       | 12.0     |
|              | MetYPCP-G1 | 68850         | 72360  | 60140  | 5070          | 5070  | 4430  | 0.07364               | 0.07007 | 0.07366 | 0.0724554  | 91  | 87  | 91  | 90       | 2.6      |
|              | PCP-G1     | 66090         | 56780  | 53050  | 5350          | 3860  | 4170  | 0.08095               | 0.06798 | 0.07861 | 0.0758457  | 100 | 84  | 97  | 94       | 8.5      |
|              | MV-V       | 58160         | 49940  | 53740  | 750           | 550   | 670   | 0.0129                | 0.01101 | 0.01247 | 0.0121254  | 16  | 14  | 15  | 15       | 1.2      |

**Table S2. Raw data from the luciferase reporter assays presented in Figure 6b.** Mean ratios between firefly and *Renilla* luciferase activities were calculated (F/R) and are presented as percentages (%) of the treated EV control in 5 independent experiments. Mean values and standard deviation (S.D.) are presented for not-treated (NT) and IFN- $\beta$ -treated (IFN) conditions.

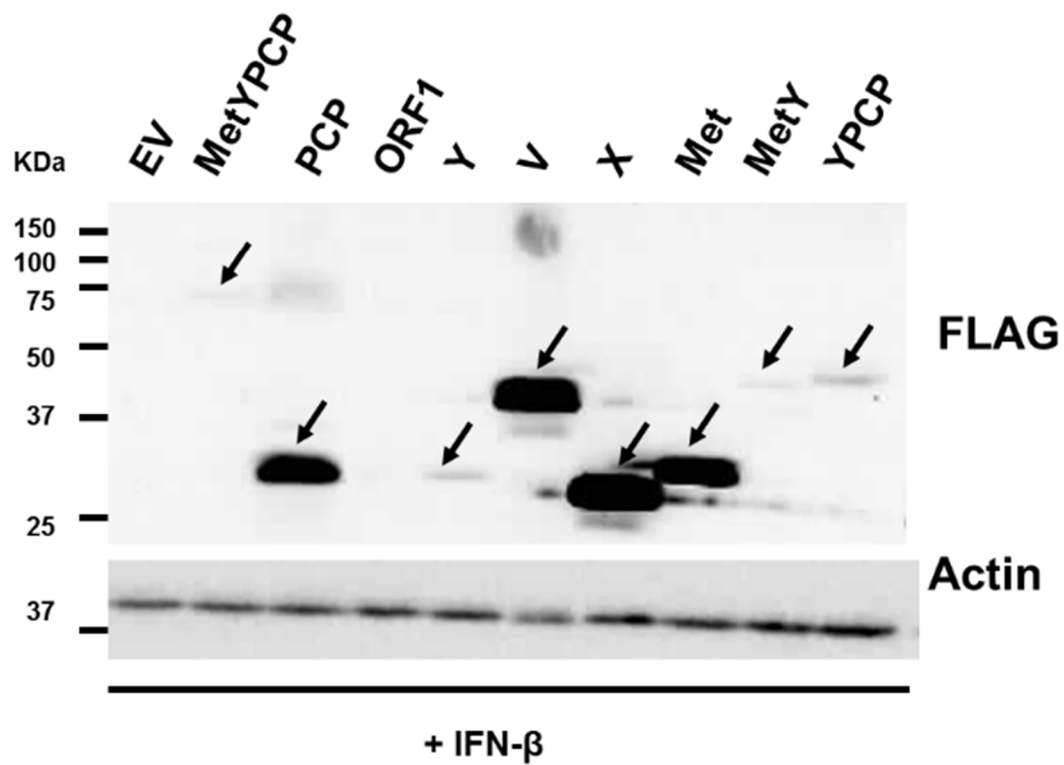

**Figure S1. Expression of FLAG-tagged full-length and domains of ORF1 in co-transfected 293T cells.** Cell lysates generated for the luciferase reporter assay (Figure 1c) were analysed by immunoblotting using an anti-FLAG antibody. Bands corresponding to the different FLAG-tagged proteins are shown by arrows. Note that ORF1 was not detected. Actin served as loading control.

## Experiment 1

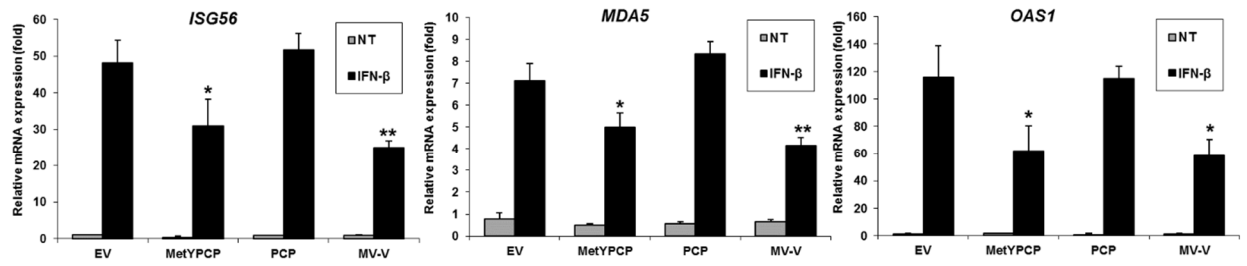

## Experiment 2

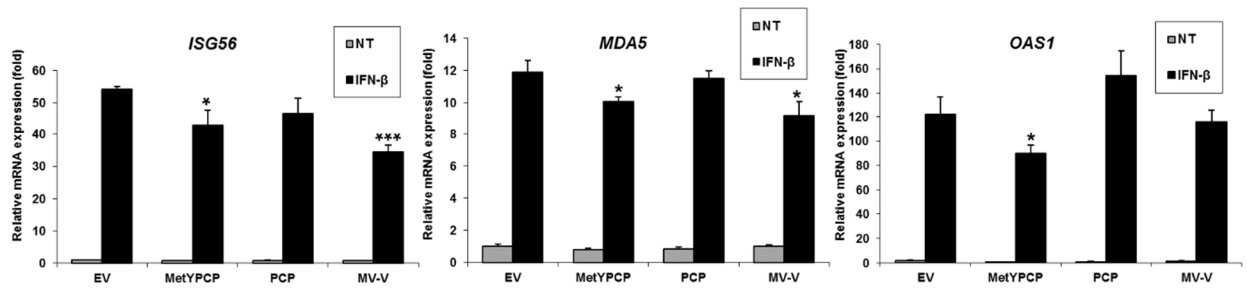

## Experiment 3

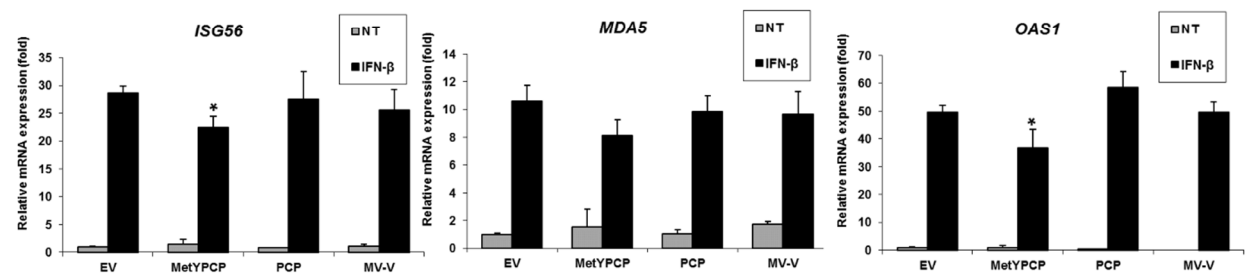

**Figure S2.** Relative expression of ISG56, MDA5 and OAS1 mRNA determined by RT-qPCR for each of the 3 independent experiments presented in Figure 2. Data are presented as fold induction (+ standard deviations) relative to the non-stimulated EV control. \*,  $P < 0.05$ ; \*\*,  $P < 0.005$ ; \*\*\*,  $P < 0.0005$  compared to EV control for treated samples (unpaired t tests).

(a)

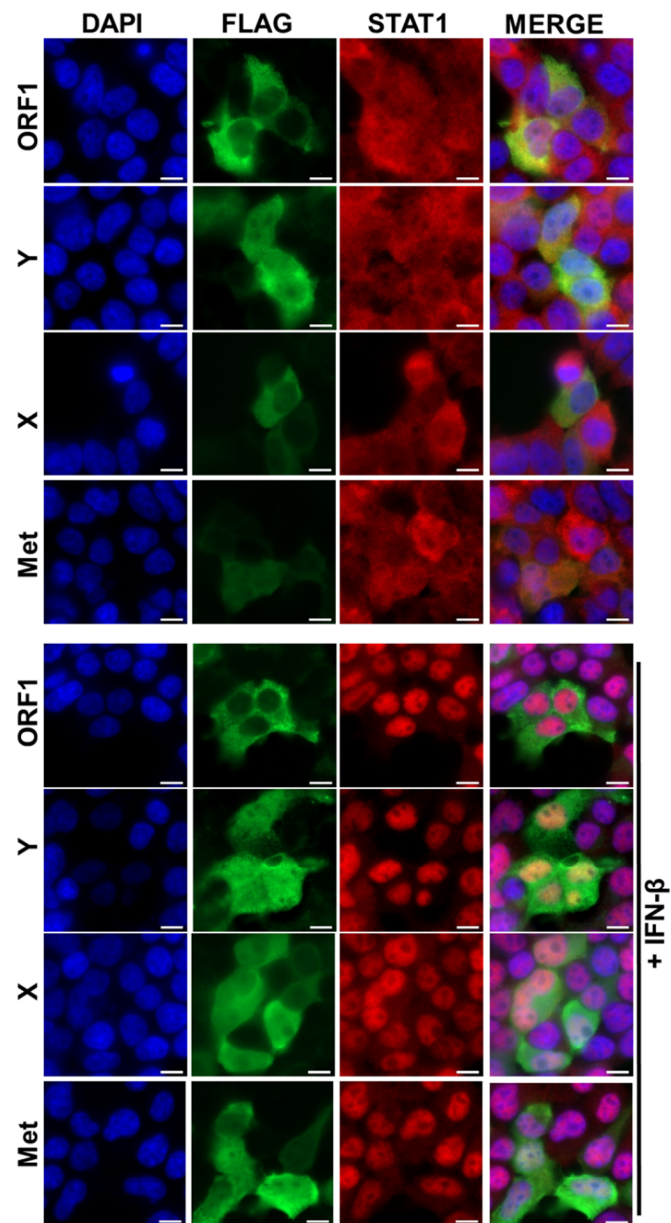

(b)

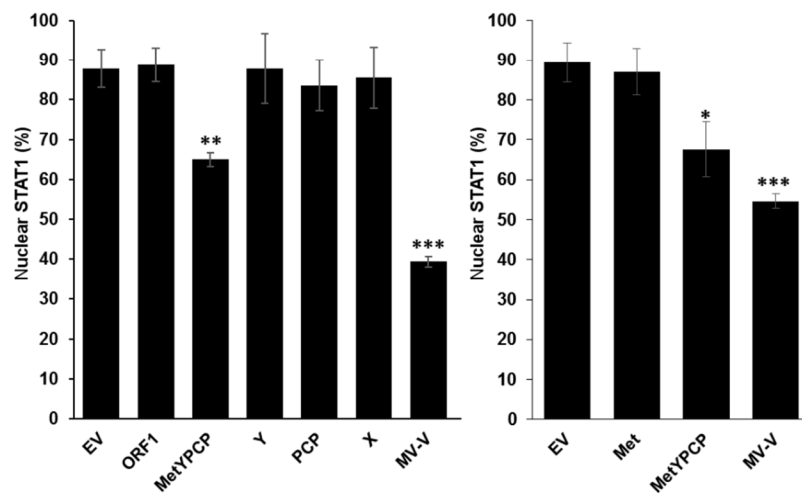

**Figure S3. Expression of ORF1, Y, X and Met of HEV ORF1 has no impact on STAT1 nuclear translocation upon IFN- $\beta$  treatment.** (a) 293T cells were transfected with a pCINeo-3xFLAG empty vector (EV) or a plasmid coding for ORF1, Y, X or Met fused to a FLAG tag. Twenty four h post-transfection, cells were left untreated or stimulated for 30 min with 1000 IU/ml of IFN- $\beta$ . Cells were then washed, fixed and stained with primary antibodies raised against STAT1 and FLAG, followed by fluorescent dye-conjugated secondary antibodies. Intracellular localization of DAPI-stained nuclei (blue), FLAG (green) and STAT1 (red) was visualized by microscopy (magnification, x630). Scale bars, 10  $\mu$ m. (b) STAT1 localization was visualized after immunostaining as described in (a) in 293T cells transfected with a pCINeo-3xFLAG empty vector (EV) or a plasmid coding for ORF1, MetYPCP, PCP, X, Y, Met or MV-V fused to a FLAG tag. For each condition, STAT1 localization was determined in 48 to 181 cells expressing the corresponding FLAG-tagged protein (except for the EV control for which 356 to 384 cells were randomly assessed). The mean percentage ( $\pm$  standard deviation) of cells showing a predominant nuclear localization of STAT1 from 3 independent experiments is shown. \* $p < 0.05$ ; \*\* $p < 0.005$ ; \*\*\* $p < 0.0005$  compared to EV control for treated samples (unpaired t tests). (a-b) Data presented for the Met domain are from a different set of experiments than the one presented for ORF1, Y and X.

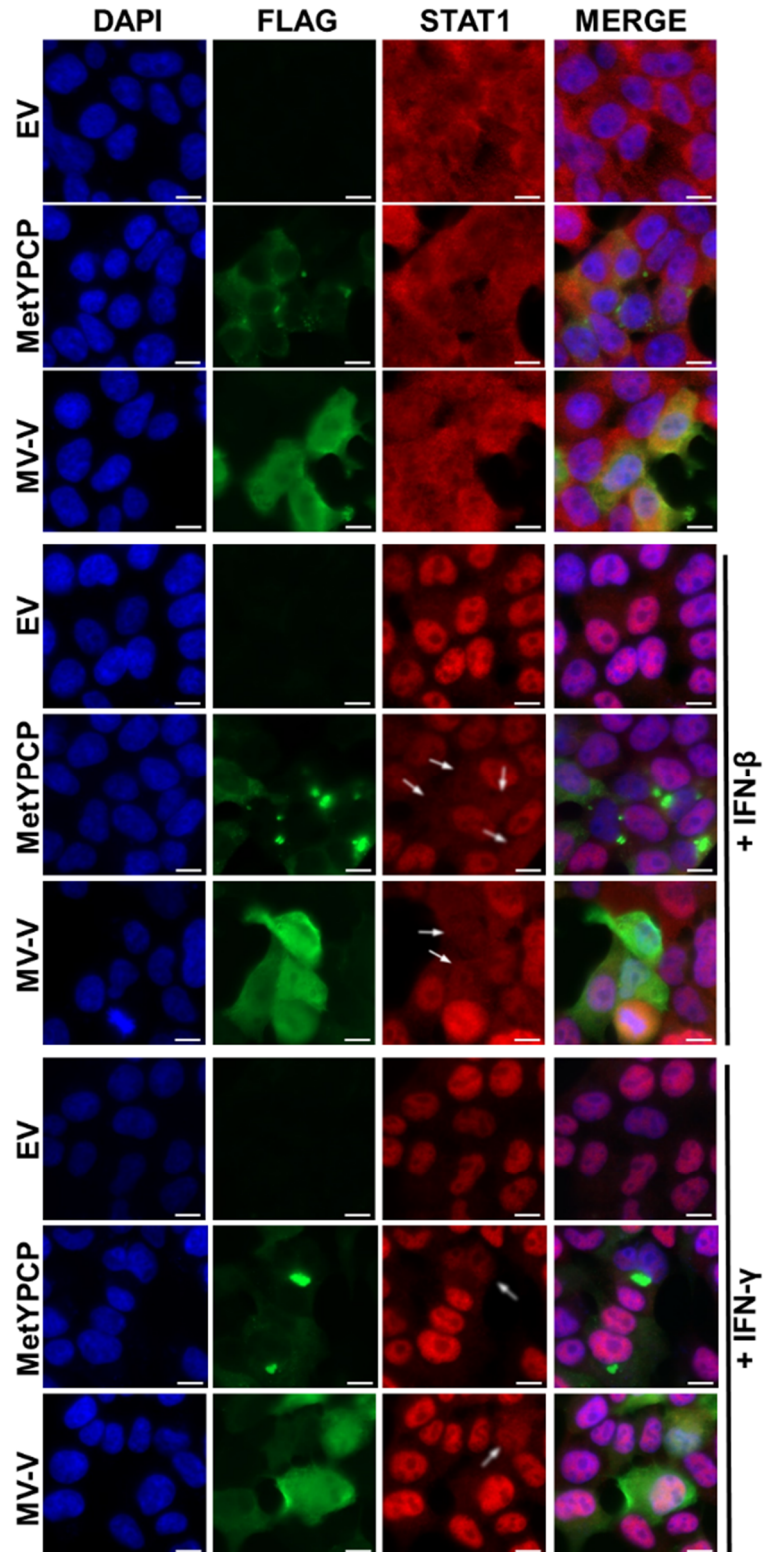

**Figure S4. Effect of MetYPCP of HEV ORF1 on STAT1 translocation in response to IFN-II.** 293T cells were transfected with a pCINeo-3×FLAG empty vector (EV) or a plasmid coding for MetYPCP or MV-V fused to a 3×FLAG tag. Twenty four h post-transfection, cells were stimulated for 30 min with 1000 IU/ml of IFN- $\beta$  or 250 ng/ml of IFN- $\gamma$ . Cells were then washed, fixed and stained with primary antibodies raised against STAT1 and FLAG, followed by fluorescent dye-conjugated secondary antibodies. Cells showing diffuse cytoplasmic/nuclear localisation of STAT1 upon IFN- $\beta$  treatment are indicated by arrows. Scale bars, 10  $\mu$ m.

|                   |     |                                                     |     |
|-------------------|-----|-----------------------------------------------------|-----|
| <b>MetYPCP-G1</b> | 1   | MEAHQFIKAPGITTAIEQAALAAANSALANAVVVRPFLSHQQIEILINLM  | 50  |
| <b>MetYPCP-G3</b> | 1   | MEAHQFIKAPGITTAIEQAALAAANSALANAVVVRPFLSRVQTDILINLM  | 50  |
| <b>MetYPCP-G1</b> | 51  | QPRQLVFRPEVFWNHPIQRVIHNELELYCRARSGRCLEIGHAPRSINDNP  | 100 |
| <b>MetYPCP-G3</b> | 51  | QPRQLVFRPEVLWNHPIQRVIHNELEQYCRARAGRCLEVGAHPRSINDNP  | 100 |
| <b>MetYPCP-G1</b> | 101 | NVVHRCFLRPVGRDVQRWYTAPTRGPAANCRRSALRGLPAADRITYCFDGF | 150 |
| <b>MetYPCP-G3</b> | 101 | NVLHRCFLRPVGRDVQRWYSAPTRGPAANCRRSALRGLPPVDRTYCFDGF  | 150 |
| <b>MetYPCP-G1</b> | 151 | SGCNFPAETGIALYSLHDMSPSDVAEAMFRHGMTRLYAALHLPPEVLLPP  | 200 |
| <b>MetYPCP-G3</b> | 151 | SRCAFAAETGIALYSLHDLWPSDVAEAMARHGMTRLYAALHLPPEVLLPP  | 200 |
| <b>MetYPCP-G1</b> | 201 | GTYRTASYLLIHDGRRVVVTYEGDTSAGYNHDVSNLRSWIRTTKVTGDHP  | 250 |
| <b>MetYPCP-G3</b> | 201 | GTYHTTSYLLIHDGNRAVVVTYEGDTSAGYNHDVSLRAWIRTTKIVGDHP  | 250 |
| <b>MetYPCP-G1</b> | 251 | LVIERVRAIGCHFVLLLTAAPESPMPYPYPRSTEVYVRSIFGPGGTPS    | 300 |
| <b>MetYPCP-G3</b> | 251 | LVIERVRAIGCHFVLLLTAAPESPMPYPYPRSTEVYVRSIFGPGGSPS    | 300 |
| <b>MetYPCP-G1</b> | 301 | LFPTSCSTKSTFHAVPTHIWDRMLMFGATLDDQAFCCSRLMTYLRGISYK  | 350 |
| <b>MetYPCP-G3</b> | 301 | LFPSACSTKSTFHAVPVHIWDRMLMFGATLDDQAFCCSRLMTYLRGISYK  | 350 |
| <b>MetYPCP-G1</b> | 351 | VTVGTLVANEGWNASEDALTAAYLTICHQRYLRTQAISKGMRRLER      | 400 |
| <b>MetYPCP-G3</b> | 351 | VTVGALVANEGWNASEDALTAAYLTICHQRYLRTQAISKGMRRLEV      | 400 |
| <b>MetYPCP-G1</b> | 401 | EHAQKFITRLYSWLFEEKSGRDYIPGRQLEFYAQCRRWLSAGFHLDPVRLV | 450 |
| <b>MetYPCP-G3</b> | 401 | EHAQKFITRLYSWLFEEKSGRDYIPGRQLQFYAQCRRWLSAGFHLDPVRLV | 450 |
| <b>MetYPCP-G1</b> | 451 | FDESAPCHCRTAIRKAFSKFCCFMKWLQECTCFLQPAEGVVGDAQHDNE   | 500 |
| <b>MetYPCP-G3</b> | 451 | FDEAVPCRCRSLKKVAGKFCCFMKWLQECTCFLQPAEGLVGDCGHNE     | 500 |
| <b>MetYPCP-G1</b> | 501 | AYEGSDVDPAESAISDISGSYVVPGTALQPLYQALDLP AEIVARAGRLTA | 550 |
| <b>MetYPCP-G3</b> | 501 | AYEGSEVDPAEPAHLDVSGTYAVHGRQLEALYRALNIPDDIAARASRLTA  | 550 |
| <b>MetYPCP-G1</b> | 551 | TVKVSQVDGRIDCETLLGNKTFRTSFVDGAVLETNGPERHNL          | 592 |
| <b>MetYPCP-G3</b> | 551 | TVELAASPGRLECRTVLGNKTFRTSITDGAHLEANGPEQYVL          | 592 |

**Figure S5. Alignment of the amino acid sequence of MetYPCP from genotypes 1 and 3.** The amino acid sequence of MetYPCP from genotype 1 (MetYPCP-G1) is 86% identical to the one of MetYPCP from genotype 3 (MetYPCP-G3). Pairwise Sequence Alignment (PROTEIN) EMBOSS Needle was used ([https://www.ebi.ac.uk/Tools/psa/emboss\\_needle/](https://www.ebi.ac.uk/Tools/psa/emboss_needle/)). Different amino acids are highlighted in red. : indicates similar amino acids.

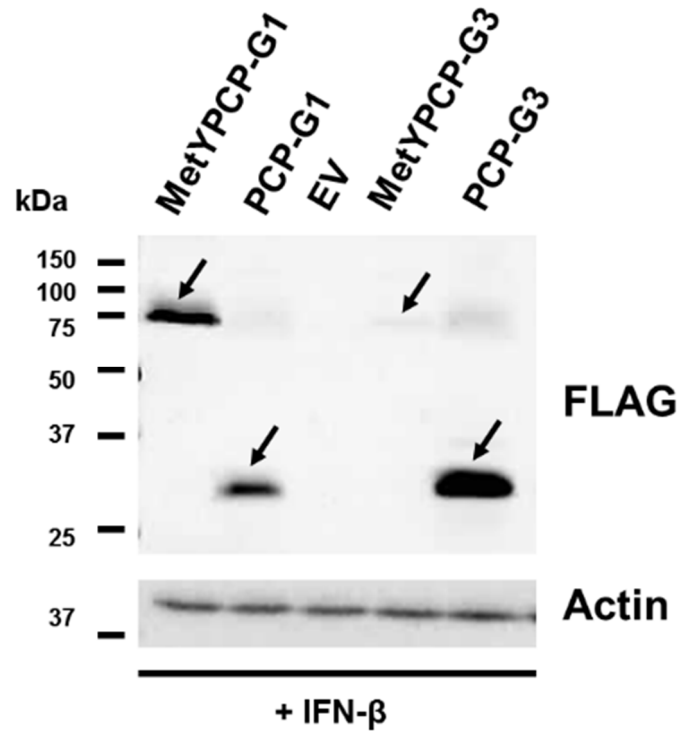

**Figure S6.** Expression of FLAG-tagged MetYPCP and PCP from genotypes 1 and 3 in co-transfected 293T cells. Cell lysates generated for the luciferase reporter assay (Figure 6b) were analysed by immunoblotting using an anti-FLAG antibody. Bands corresponding to the different FLAG-tagged proteins are shown by arrows. Actin served as loading control.

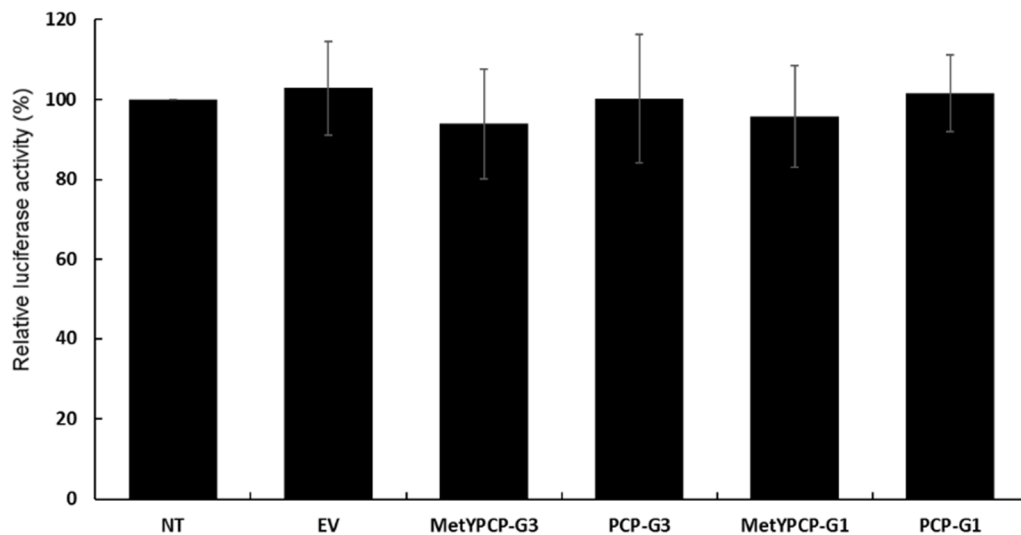

**Figure S7.** Cell viability assay in cells expressing MetYPCP and PCP from HEV-1 and HEV-3. 293T cells were transfected or not (NT) with a pCINeo-3xFLAG empty vector (EV) or a plasmid coding for MetYPCP and PCP from genotype 1 and 3 fused to a 3xFLAG tag. Forty h after transfection, cells were lysed and cell viability determined using a luminescent-based assay. Luciferase activities ( $\pm$  standard deviations) are expressed as percentage relative to non-transfected cells. No significant difference was found between the cells transfected with the pCINeo-3xFLAG empty vector and the one transfected with the plasmids coding for MetYPCP or PCP from HEV-1 and HEV-3 (unpaired t tests). Results represent the mean of 3 independent experiments performed in triplicate.

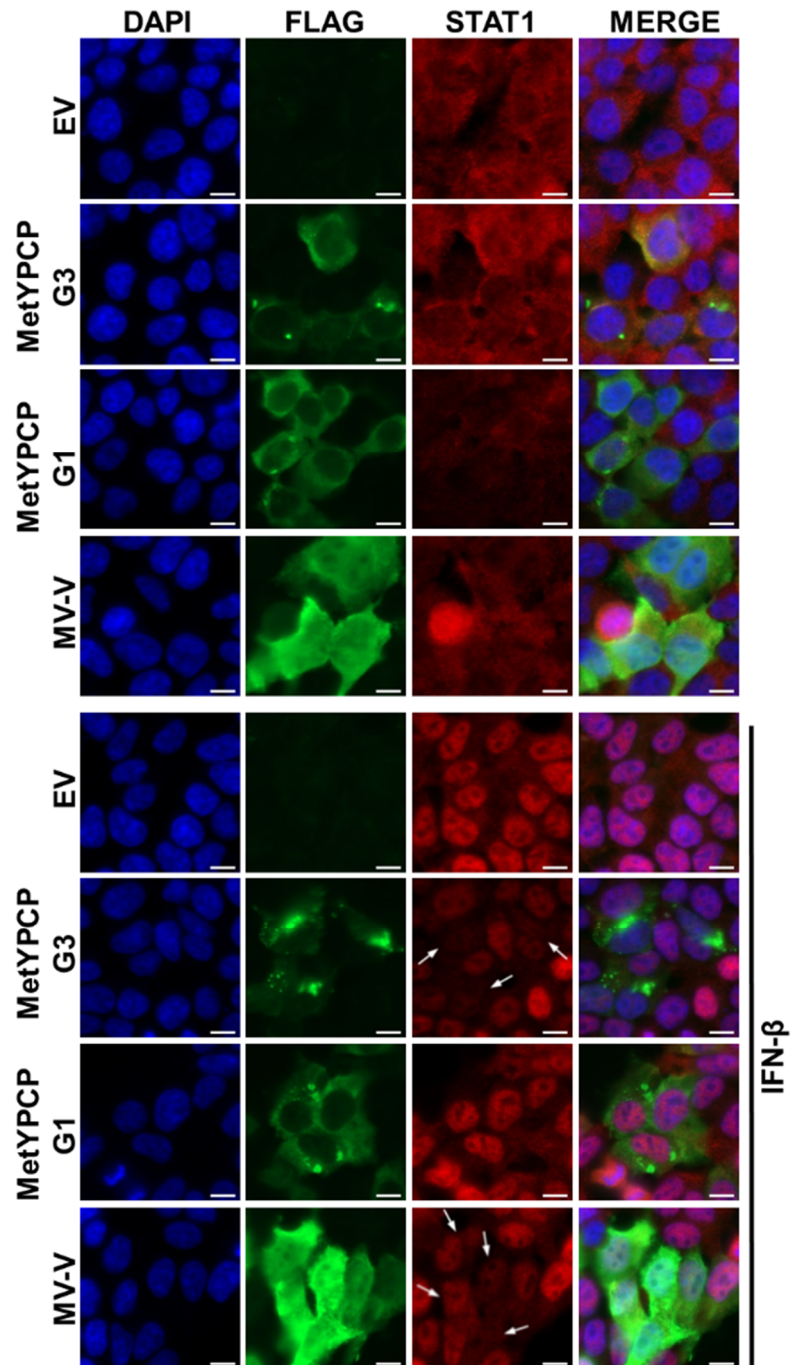

**Figure S8. Effect of MetYPCP from HEV-1 on STAT1 translocation.** 293T cells were transfected with a pCINeo-3xFLAG empty vector (EV) or a plasmid coding for MetYPCP from HEV-1 or HEV-3 or MV-V fused to a 3xFLAG tag. Twenty-four h post-transfection, cells were stimulated for 30 min with 1000 IU/ml of IFN- $\beta$ . Cells were then washed, fixed and stained with primary antibodies raised against STAT1 and FLAG, followed by fluorescent dye-conjugated secondary antibodies. Cells showing diffuse STAT1 cytoplasmic/nuclear localisation upon IFN- $\beta$  treatment are indicated by arrows. Scale bars, 10  $\mu$ m.
